# Supplementary material for: Development of microsatellite markers for identifying Brazilian Coffea arabica varieties
Source: PubMed Central journal article supplement (PMC3036114; doi:10.1590/s1415-47572010005000055), 2010-09-01
Supplement: gmb-33-3-515-suppl1.pdf [file gmb-33-3-515-suppl1.pdf]

**Supplemental Table 1.** Identification of the ERiCC accessions, their origin and common name.

|    | CNPAF Germplasm Bank<br>Identification Number | Cultivation<br>System* | Origin**    | Common Name             |
|----|-----------------------------------------------|------------------------|-------------|-------------------------|
| 1  | CNA0000082                                    | L                      | Suriname    | AWINI                   |
| 2  | CNA0000122                                    | L                      | India       | ARC-10666               |
| 3  | CNA0000586                                    | L                      | Sri Lanka   | BG 090-2                |
| 4  | CNA0000692                                    | L                      | India       | BKN 6820-6-3-2          |
| 5  | CNA0000754                                    | L                      | Peru        | CHANCAY                 |
| 6  | CNA0000798                                    | L                      | Colombia    | CICA 4                  |
| 7  | CNA0000923                                    | L                      | Mexico      | C 79-272-4-1-2-3-10     |
| 8  | CNA0000950                                    | L                      | India       | IET 0355                |
| 9  | CNA0000952                                    | L                      | Pakistan    | CR 36-148               |
| 10 | CNA0001419                                    | L                      | Colombia    | COLOMBIA 1              |
| 11 | CNA0001420                                    | L                      | Colombia    | CARREON                 |
| 12 | CNA0001423                                    | L                      | Colombia    | TAPURIPA-161            |
| 13 | CNA0001467                                    | L                      | India       | IET 2881                |
| 14 | CNA0002222                                    | L                      | Lao         | KH.YOUANE (V.T.A 13)    |
| 15 | CNA0002246                                    | L                      | Lao         | KH.NGANH TAMAY (SVA 33) |
| 16 | CNA0002253                                    | L                      | Lao         | KH.KHAO BAY (VT-A 25)   |
| 17 | CNA0002258                                    | L                      | Thailand    | KU 56-3                 |
| 18 | CNA0002293                                    | L                      | Thailand    | KU 94-2                 |
| 19 | CNA0002416                                    | L                      | Liberia     | LAC 12                  |
| 20 | CNA0002437                                    | L                      | Liberia     | LAC 28                  |
| 21 | CNA0002480                                    | L                      | Cameroon    | M 40                    |
| 22 | CNA0002482                                    | L                      | Cameroon    | M 44                    |
| 23 | CNA0002529                                    | L                      | Philippines | MEHR                    |
| 24 | CNA0002672                                    | L                      | Thailand    | NAHNG PAYA 132          |
| 25 | CNA0002871                                    | L                      | Portugal    | RIZZOTO 159             |
| 26 | CNA0003195                                    | L                      | Egypt       | GZ 944-5-2-2            |
| 27 | CNA0003196                                    | L                      | Egypt       | GZ 809-4-1-2            |
| 28 | CNA0003005                                    | U                      | India       | 110281                  |
| 29 | CNA0003241                                    | L                      | India       | PAU 41-306-2-1-PR 405   |
| 30 | CNA0003411                                    | L                      | Colombia    | CICA 8                  |
| 31 | CNA0003417                                    | L                      | Japan       | PI 294351               |
| 32 | CNA0003446                                    | L                      | Philippines | IR 34                   |
| 33 | CNA0003452                                    | L                      | -           | CHIANUNG SEN 25         |

|    | CNPAF Germplasm Bank<br>Identification Number | Cultivation<br>System* | Origin**    | Common Name          |
|----|-----------------------------------------------|------------------------|-------------|----------------------|
| 34 | CNA0003569                                    | L                      | India       | KAU 2110             |
| 35 | CNA0003591                                    | L                      | India       | TNAU 2686-1          |
| 36 | CNA0003602                                    | L                      | India       | UPR 79-23            |
| 37 | CNA0003665                                    | L                      | Taiwan      | KAOHSIUNG SEN YU 104 |
| 38 | CNA0003668                                    | L                      | Philippines | MTU 7029             |
| 39 | CNA0004308                                    | L                      | USA         | CAROLINA SP 407      |
| 40 | CNA0004552                                    | L                      | Colombia    | CR 1113              |
| 41 | CNA0004566                                    | L                      | Colombia    | METICA 1             |
| 42 | CNA0004576                                    | L                      | Colombia    | ZENIT                |
| 43 | CNA0004579                                    | L                      | Colombia    | CAMPONI              |
| 44 | CNA0004625                                    | L                      | Colombia    | TETEP                |
| 45 | CNA0004629                                    | L                      | Philippines | IR 50                |
| 46 | CNA0005014                                    | L                      | China       | WU 10 B              |
| 47 | CNA0005015                                    | L                      | China       | YAR AI ZHAO B        |
| 48 | CNA0005016                                    | L                      | China       | ZHENSHAN 97 A        |
| 49 | CNA0005477                                    | L                      | China       | K ASKHAM 36/14       |
| 50 | CNA0005478                                    | L                      | China       | SZU MAIO             |
| 51 | CNA0005853                                    | L                      | Russia      | WIR 5621             |
| 52 | CNA0006910                                    | L                      | Indonesia   | MANINJAU             |
| 53 | CNA0006943                                    | L                      | Philippines | IR 54 R              |
| 54 | CNA0006955                                    | L                      | Italy       | KORAL                |
| 55 | CNA0006961                                    | L                      | Italy       | VITRO                |
| 56 | CNA0007408                                    | L                      | Colombia    | WC 0144              |
| 57 | -                                             | L                      | Suriname    | ELONI                |
| 58 | -                                             | L                      | Suriname    | CIWINI               |
| 59 | -                                             | L                      | Suriname    | CESWONI              |
| 60 | -                                             | L                      | Philippines | IR8                  |
| 61 | -                                             | L                      | Philippines | IR36                 |
| 62 | -                                             | L                      | USA         | LEBONNET             |
| 63 | -                                             | L                      | India       | BASMATI 370          |
| 64 | -                                             | L                      | Japan       | NOURIN MOCHI         |
| 65 | -                                             | L                      | Japan       | MINAMI HATA MOCHI    |
| 66 | -                                             | L                      | Japan       | TOMOE MOCHI          |
| 67 | -                                             | L                      | Japan       | MOGAMI CHIKANARI     |
| 68 | -                                             | L                      | Colombia    | ORYZICA LHANOS4      |
| 69 | -                                             | L                      | Colombia    | ORYZICA 1            |
| 70 | -                                             | L                      | Colombia    | CICA 7               |
| 71 | -                                             | L                      | Colombia    | CICA 9               |
| 72 | -                                             | L                      | Philippines | HUAN-SEN-GO          |
| 73 | -                                             | L                      | -           | 5287                 |
| 74 | -                                             | L                      | -           | RAMTULASI            |
| 75 | CNA0000482                                    | U                      | USA         | BLUEBONNET           |
| 76 | CNA0001006                                    | U                      | USA         | DAWN                 |
| 77 | CNA0002524                                    | U                      | France      | MOROBEREKAN          |
| 78 | CNA0003287                                    | U                      | France      | IREM 123-2-1         |
| 79 | CNA0003288                                    | U                      | France      | IREM 293-B           |

|     | CNPAF Germplasm Bank<br>Identification Number | Cultivation<br>System* | Origin** | Common Name                       |
|-----|-----------------------------------------------|------------------------|----------|-----------------------------------|
| 80  | CNA0003289                                    | U                      | France   | IREM 247                          |
| 81  | CNA0003362                                    | U                      | France   | IRAT 142                          |
| 82  | CNA0003375                                    | U                      | France   | IRAT 13                           |
| 83  | CNA0003395                                    | U                      | France   | IRAT 141                          |
| 84  | CNA0003397                                    | U                      | France   | IRAT 144                          |
| 85  | CNA0003403                                    | U                      | Nigeria  | TOX 490-3-108-D1-B-B              |
| 86  | CNA0004193                                    | U                      | France   | IREM 656                          |
| 87  | CNA0004428                                    | U                      | France   | N.7384 [RPL X DANIELA]            |
| 88  | CNA0004463                                    | U                      | France   | N.7441 [CA 435 X TAINUNG CHUEN 2] |
| 89  | CNA0004480                                    | U                      | France   | IRAT 124                          |
| 90  | CNA0004487                                    | U                      | France   | MAKOUTA                           |
| 91  | CNA0004543                                    | U                      | Nigeria  | TOX 1012-12-3-1                   |
| 92  | CNA0004617                                    | U                      | Nigeria  | TOX 1011-4-2                      |
| 93  | CNA0004640                                    | U                      | Nigeria  | TOX 1785-19-18                    |
| 94  | CNA0004697                                    | U                      | France   | N.2583                            |
| 95  | CNA0004752                                    | U                      | France   | IRAT 122                          |
| 96  | CNA0004759                                    | U                      | Nigeria  | TOX 514-16-101-1                  |
| 97  | CNA0004788                                    | U                      | Nigeria  | TOX 503-4-115-B-B                 |
| 98  | CNA0004796                                    | U                      | Nigeria  | TOX 516-28-10B-D2-B-B             |
| 99  | CNA0005277                                    | U                      | Nigeria  | TOX 1858-114                      |
| 100 | CNA0005326                                    | U                      | Nigeria  | TOX 1780-8-5                      |
| 101 | CNA0005334                                    | U                      | Nigeria  | TOX 1871-29                       |
| 102 | CNA0005358                                    | U                      | Nigeria  | TOX 1858-101                      |
| 103 | CNA0005970                                    | U                      | Nigeria  | FAROX 299                         |
| 104 | CNA0005972                                    | U                      | Nigeria  | FAROX 301                         |
| 105 | CNA0005994                                    | U                      | Nigeria  | TOX 995-208-1-101                 |
| 106 | CNA0006034                                    | U                      | Nigeria  | ITA 150                           |
| 107 | CNA0006035                                    | U                      | Nigeria  | ITA 225                           |
| 108 | CNA0006572                                    | U                      | France   | IREM 195                          |
| 109 | CNA0006574                                    | U                      | France   | IRAT 112                          |
| 110 | CNA0006940                                    | U                      | USA      | LEMONT                            |
| 111 | CNA0006941                                    | U                      | USA      | NEW BONNET                        |
| 112 | CNA0008092                                    | U                      | France   | L 141                             |
| 113 | CNA0008093                                    | U                      | France   | L 285                             |
| 114 | CNA0008411                                    | U                      | USA      | BLUE BELLE                        |
| 115 | CNA0008412                                    | U                      | USA      | BLUEBONNET 50                     |
| 116 | CNA0008432                                    | U                      | USA      | LACASSINE                         |
| 117 | CNA0008545                                    | U                      | Colombia | CT 11216-10-12-B-BRM-10           |
| 118 | CNA0009102                                    | U                      | Colombia | CT10006-7-2-M-5-1P-3              |
| 119 | CNA0009113                                    | U                      | Colombia | CT10037-9-4-M-1-1P-2-M            |
| 120 | CNA0009115                                    | U                      | Colombia | CT11632-3-3-M                     |
| 121 | CNA0009123                                    | U                      | Colombia | CT11891-3-3-3-M                   |
| 122 | CNA0009124                                    | U                      | Colombia | CT13364-7-1                       |
| 123 | CNA0009139                                    | U                      | Colombia | CT13366-15-4                      |
| 124 | CNA0009154                                    | U                      | Colombia | CT13370-2-M                       |

|     | CNPAF Germplasm Bank<br>Identification Number | Cultivation<br>System* | Origin**              | Common Name      |
|-----|-----------------------------------------------|------------------------|-----------------------|------------------|
| 125 | CNA0009197                                    | U                      | Colombia              | CT13377-8-4      |
| 126 | CNA0009199                                    | U                      | Colombia              | CT13381-1-3      |
| 127 | CNA0009223                                    | U                      | Colombia              | CT13569-5-7      |
| 128 | CNA0009227                                    | U                      | Colombia              | CT13570-3-2      |
| 129 | CNA0009240                                    | U                      | Colombia              | CT13572-6-2      |
| 130 | CNA0009280                                    | U                      | Colombia              | CT13573-11-2     |
| 131 | CNA0009319                                    | U                      | Colombia              | CT13579-3-4      |
| 132 | CNA0009364                                    | U                      | Colombia              | CT13581-5-2      |
| 133 | CNA0009415                                    | U                      | Colombia              | CT13582-11-4     |
| 134 | CNA0009561                                    | U                      | Colombia              | CT13584-12-9     |
| 135 | CNA0009591                                    | U                      | Colombia              | CT13585-12-3     |
| 136 |                                               | U                      | -                     | B6149F-MR-19     |
| 137 | -                                             | U                      | Philippines           | B8503-TB-19-B-3  |
| 138 | -                                             | U                      | -                     | BR4742-B-19-23   |
| 139 | -                                             | U                      | India                 | CUTACK 4         |
| 140 | -                                             | U                      | Philippines           | IR65907-188-1-B  |
| 141 | -                                             | U                      | France                | IRAT 10          |
| 142 | -                                             | U                      | Philippines           | KATAKTARA        |
| 143 | -                                             | U                      | Philippines           | TB154E-TB-2      |
| 144 | -                                             | U                      | Philippines           | TB47H-MR-11-51-3 |
| 145 | -                                             | U                      | Philippines           | YN1905-UUL-62    |
| 146 | -                                             | U                      | Philippines           | YN906-UUL 65     |
| 147 | -                                             | U                      | China                 | YUNLU N 1        |
| 148 | -                                             | U                      | China                 | YUNLU N 7        |
| 149 | -                                             | L                      | EMBRAPA-CNPAF/ Brazil | RS16PL12-35-1-B  |
| 150 | -                                             | L                      | EMBRAPA-CNPAF/ Brazil | RS16PL1-34-4-B   |
| 151 | -                                             | L                      | EMBRAPA-CNPAF/ Brazil | RS16PL5-12-6-B   |
| 152 | -                                             | L                      | EMBRAPA-CNPAF/ Brazil | RS16PL12-10-1-B  |
| 153 | CNA0001416                                    | L                      | EMBRAPA-CNPAF/ Brazil | IPSL 0574        |
| 154 | CNA0001117                                    | L                      | EEPG/ Brazil          | EEPG-1-169       |
| 155 | -                                             | L                      | EMBRAPA-CPACT/ Brazil | BRS AGRISUL      |
| 156 | -                                             | L                      | EMBRAPA-CPACT/ Brazil | BRS BOJURU       |
| 157 | -                                             | L                      | EMBRAPA-CNPAF/ Brazil | DIAMANTE         |
| 158 | -                                             | L                      | EMBRAPA-CNPAF/ Brazil | BRS FORMOSO      |
| 159 | -                                             | L                      | EMBRAPA-CNPAF/ Brazil | MARAJÓ           |
| 160 | -                                             | L                      | EMBRAPA-CNPAF/ Brazil | BRS JABURU       |
| 161 | -                                             | L                      | EMBRAPA-CNPAF/ Brazil | BRS BIGUA        |
| 162 | -                                             | L                      | EMBRAPA-CNPAF/ Brazil | RIO GRANDE       |
| 163 | -                                             | L                      | EPAGRI/ Brazil        | EPAGRI 107       |
| 164 | -                                             | L                      | EPAGRI/ Brazil        | EPAGRI 108       |
| 165 | -                                             | L                      | EPAGRI/ Brazil        | SCS 111          |
| 166 | -                                             | L                      | EPAGRI/ Brazil        | SCS 112          |
| 167 | CNA0001337                                    | L                      | IPEACO/ Brazil        | IPEACO-SL 1969   |
| 168 | CNA0001339                                    | L                      | IPEACO/ Brazil        | IPEACO-SL 0769   |
| 169 | CNA0001344                                    | L                      | IPEACO/ Brazil        | IPEACO-SL 1469   |

|     | CNPAF Germplasm Bank<br>Identification Number | Cultivation<br>System* | Origin**              | Common Name              |
|-----|-----------------------------------------------|------------------------|-----------------------|--------------------------|
| 170 | CNA0001407                                    | L                      | IPEACO/ Brazil        | IPSL 2070                |
| 171 | CNA0001413                                    | L                      | IPEACO/ Brazil        | IPSL 0970                |
| 172 | CNA0001414                                    | L                      | IPEACO/ Brazil        | IPSL 0570                |
| 173 | CNA0001106                                    | L                      | IRGA/ Brazil          | EEA 405                  |
| 174 | CNA0001107                                    | L                      | IRGA/ Brazil          | EEA 401                  |
| 175 | CNA0001108                                    | L                      | IRGA/ Brazil          | EEA 404                  |
| 176 | CNA0001109                                    | L                      | IRGA/ Brazil          | EEA 406                  |
| 177 | -                                             | L                      | IRGA/ Brazil          | IRGA 409                 |
| 178 | -                                             | L                      | IRGA/ Brazil          | IRGA 413                 |
| 179 | -                                             | L                      | IRGA/ Brazil          | IRGA 416                 |
| 180 | -                                             | L                      | IRGA/ Brazil          | IRGA 417                 |
| 181 | -                                             | L                      | IRGA/ Brazil          | IRGA 418                 |
| 182 | -                                             | L                      | IRGA/ Brazil          | IRGA 419                 |
| 183 | -                                             | L                      | IRGA/ Brazil          | IRGA 420                 |
| 184 | CNA0006129                                    | L                      | EMPASC/ Brazil        | EMPASC 103               |
| 185 | CNA0006130                                    | L                      | EMPASC/ Brazil        | EMPASC 104               |
| 186 | CNA0001118                                    | U                      | EEPG/ Brazil          | EEPG-1-269-FURNAS        |
| 187 | CNA0000963                                    | U                      | IPEACO/ Brazil        | AMARELAO X GUEDES        |
| 188 | CNA0000969                                    | U                      | IPEACO/ Brazil        | HONDURAS X MATAO         |
| 189 | CNA0000976                                    | U                      | IPEACO/ Brazil        | SATURNO X PRATAO PRECOCE |
| 190 | CNA0000994                                    | U                      | IPEACO/ Brazil        | ESAV X MATAO             |
| 191 | CNA0001347                                    | U                      | IPEACO/ Brazil        | IPEACO-SL 2270           |
| 192 | CNA0001350                                    | U                      | IPEACO/ Brazil        | IPEACO-SL 1970           |
| 193 | CNA0004098                                    | U                      | EMBRAPA-CNPAF/ Brazil | XINGU                    |
| 194 | CNA0004120                                    | U                      | EMBRAPA-CNPAF/ Brazil | RIO PARAGUAY             |
| 195 | CNA0004121                                    | U                      | EMBRAPA-CNPAF/ Brazil | GUARANI                  |
| 196 | CNA0004141                                    | U                      | EMBRAPA-CNPAF/ Brazil | TRIUNFO                  |
| 197 | CNA0004172                                    | U                      | EMBRAPA-CNPAF/ Brazil | GUAPORE                  |
| 198 | CNA0004206                                    | U                      | EMBRAPA-CNPAF/ Brazil | ARAGUAIA                 |
| 199 | CNA0004748                                    | U                      | EMBRAPA-CNPAF/ Brazil | CUIABANA                 |
| 200 | CNA0005180                                    | U                      | EMBRAPA-CNPAF/ Brazil | TANGARA                  |
| 201 | CNA0006187                                    | U                      | EMBRAPA-CNPAF/ Brazil | CAIAPO                   |
| 202 | CNA0006701                                    | U                      | EMBRAPA-CNPAF/ Brazil | CARAJAS                  |
| 203 | CNA0007024                                    | U                      | EMBRAPA-CNPAF/ Brazil | CNAX 1503-12-9-4-B       |
| 204 | CNA0007119                                    | U                      | EMBRAPA-CNPAF/ Brazil | AIMORE                   |
| 205 | CNA0007706                                    | U                      | EMBRAPA-CNPAF/ Brazil | CONFIANCA                |
| 206 | CNA0008070                                    | U                      | EMBRAPA-CNPAF/ Brazil | PRIMAVERA                |
| 207 | CNA0008711                                    | U                      | EMBRAPA-CNPAF/ Brazil | SOBERANA                 |
| 208 | CNA0005673                                    | U                      | IAC/ Brazil           | IAC 81-176               |
| 209 | CNA0005901                                    | U                      | IAC/ Brazil           | URUCUI                   |
| 210 | CNA0006170                                    | U                      | IAC/ Brazil           | LS 85-125                |
| 211 | CNA0006174                                    | U                      | IAC/ Brazil           | LS 85-158                |
| 212 | CNA0007799                                    | U                      | IAC/ Brazil           | IAC 1191                 |
| 213 | CNA0006406                                    | U                      | IAC/ Brazil           | LS 86-68                 |
| 214 | CNA0004168                                    | U                      | IAPAR/ Brazil         | L 80-68                  |

|     | CNPAF Germplasm Bank<br>Identification Number | Cultivation<br>System* | Origin**              | Common Name       |
|-----|-----------------------------------------------|------------------------|-----------------------|-------------------|
| 215 | CNA0005672                                    | U                      | IAPAR/ Brazil         | L 82-192          |
| 216 | CNA0006666                                    | U                      | IAPAR/ Brazil         | A12-286-1-1       |
| 217 | CNA0006672                                    | U                      | IAPAR/ Brazil         | A8-204-1-1        |
| 218 | CNA0008309                                    | U                      | IAPAR/ Brazil         | L 92-342          |
| 219 | CNA0006413                                    | U                      | IAPAR/ Brazil         | L 85-20           |
| 220 | CNA0006422                                    | U                      | IAPAR/ Brazil         | IAPAR L 99-98     |
| 221 | CNA0005650                                    | U                      | IPEACO/ Brazil        | IPEACO 11-P       |
| 222 | CNA0005660                                    | U                      | IPEACO/ Brazil        | IPEACO 77-P       |
| 223 | CNA0003281                                    | U                      | Brazil                | IRAT 177          |
| 224 | CNA0005342                                    | U                      | Brazil                | RIO VERDE         |
| 225 | CNA0002123                                    | U                      | EEPG/ Brazil          | JAPONES X PRAIANA |
| 226 | -                                             | U                      | IAC/ Brazil           | IAC 201           |
| 227 | -                                             | U                      | IAC/ Brazil           | IAC 202           |
| 228 | -                                             | U                      | IAC/ Brazil           | IAC 165           |
| 229 | -                                             | U                      | IAPAR/ Brazil         | IAPAR 9           |
| 230 | -                                             | U                      | IAPAR/ Brazil         | IAPAR 62          |
| 231 | -                                             | U                      | IAPAR/ Brazil         | IAPAR 63          |
| 232 | CNA0003490                                    | U                      | Brazil                | MEARIN            |
| 233 | CNA0004078                                    | U                      | Brazil                | -                 |
| 234 | CNA0004243                                    | U                      | Brazil                | -                 |
| 235 | CNA0005975                                    | U                      | Brazil                | -                 |
| 236 | CNA0006030                                    | U                      | EMBRAPA-CNPAF/ Brazil | -                 |
| 237 | CNA0007425                                    | U                      | EMBRAPA-CNPAF/ Brazil | CANASTRA          |
| 238 | CNA0007937                                    | U                      | EMBRAPA-CNPAF/ Brazil | PROGRESSO         |
| 239 | CNA0008172                                    | U                      | EMBRAPA-CNPAF/ Brazil | BONANCA           |
| 240 | CNA0008305                                    | U                      | EMBRAPA-CNPAF/ Brazil | CARISMA           |
| 241 | CNA0008533                                    | U                      | EMBRAPA-CNPAF/ Brazil | MARAVILHA         |
| 242 | CNA0008540                                    | U                      | EMBRAPA-CNPAF/ Brazil | TALENTO           |

\* L = lowland accessions ; U = upland accessions. For comparison with other studies, the lowland accessions used in this study were considered as indica and the upland accessions, as japonica [Khush GS (1997) Origin, dispersal, cultivation and variation of rice. Plant Molecular Biology 35:25-34].

\*\* EMBRAPA – CNPAF = Empresa Brasileira de Pesquisa Agropecuária – Centro Nacional de Pesquisa (Brazil); IAC = Instituto Agrônomo de Campinas (Brazil); IPEACO = Instituto de Pesquisa Agropecuária do Centro Oeste (Brazil); IAPAR = Instituto Agrônomo do Paraná (Brazil); EMPASC = Empresa de Pesquisa Agropecuária de Santa Catarina (Brazil); EEPG = Estação Experimental de Ponta Grossa (Brazil); IRGA = Instituto Rio Grandense do Arroz (Brazil); EPAGRI = Empresa de Pesquisa Agropecuária e Extensão Rural de Santa Catarina (Brazil)
