# Supplementary material for: Development of microsatellite markers for identifying Brazilian Coffea arabica varieties
Source: PubMed Central journal article supplement (PMC3036114; doi:10.1590/s1415-47572010005000055), 2010-09-01
Supplement: gmb-33-3-515-suppl2.pdf [file gmb-33-3-515-suppl2.pdf]

**Supplemental Table 2.** SSR Markers used for the evaluation of the ERiCC accessions (Data on “Marker concentration for multiplexed PCR”, “Missing data”, “Number of alleles” and “PIC” were obtained in this study).

| Panel | SSR Marker | Marker concentration for multiplexed PCR (nM) | Missing data (%) | Fluorochrome | Allele size range (bp) | Number of alleles | PIC  | Motif                                                                 | Chromosome | References**          |
|-------|------------|-----------------------------------------------|------------------|--------------|------------------------|-------------------|------|-----------------------------------------------------------------------|------------|-----------------------|
| 1     | RM229      | 129                                           | 5.9              | HEX          | 106–131                | 11                | 0.83 | (TC) <sub>11</sub> (CT) <sub>5</sub> C <sub>3</sub> (CT) <sub>5</sub> | 11         | Chen et al. (1997)    |
|       | RM207      | 129                                           | 3.1              | FAM          | 84–158                 | 23                | 0.86 | (CT) <sub>25</sub>                                                    | 2          | Chen et al. (1997)    |
| 2     | RM222*     | 129                                           | 10               | FAM          | 199–215                | 12                | 0.72 | (CT) <sub>18</sub>                                                    | 10         | Chen et al. (1997)    |
|       | RM1        | 71.67                                         | 0.8              | FAM          | 76–119                 | 23                | 0.75 | (AG) <sub>26</sub>                                                    | 1          | Panaud et al. (1996)  |
|       | RM248      | 150                                           | 4.1              | HEX          | 80–104                 | 11                | 0.81 | (CT) <sub>25</sub>                                                    | 7          | Chen et al. (1997)    |
|       | RM38       | 71.67                                         | 5.7              | HEX          | 246–278                | 18                | 0.86 | (GA) <sub>16</sub>                                                    | 8          | Chen et al. (1997)    |
| 3     | RM5        | 71.67                                         | 1.8              | FAM          | 109–133                | 9                 | 0.73 | (GA) <sub>14</sub>                                                    | 1          | Panaud et al. (1996)  |
|       | RM253      | 71.67                                         | 9.8              | HEX          | 89–119                 | 11                | 0.75 | (GA) <sub>25</sub>                                                    | 6          | Chen et al. (1997)    |
| 4     | RM11       | 71.67                                         | 3.6              | HEX          | 123–143                | 11                | 0.78 | (GA) <sub>17</sub>                                                    | 7          | Panaud et al. (1996)  |
|       | RM13*      | 129                                           | 4.6              | FAM          | 129–164                | 15                | 0.72 | (GA) <sub>6</sub> -GA <sub>16</sub>                                   | 5          | Panaud et al. (1996)  |
| 5     | RM252      | 129                                           | 11               | FAM          | 193–277                | 23                | 0.62 | (CT) <sub>19</sub>                                                    | 4          | Chen et al. (1997)    |
|       | RM277      | 129                                           | 1.8              | FAM          | 110–126                | 8                 | 0.58 | (GA) <sub>11</sub>                                                    | 12         | Temnykh et al. (2000) |
|       | RM204      | 129                                           | 6.9              | HEX          | 106–194                | 32                | 0.87 | (CT) <sub>44</sub>                                                    | 6          | Chen et al. (1997)    |
| 6     | RM231      | 129                                           | 10.5             | FAM          | 170–196                | 10                | 0.78 | (CT) <sub>16</sub>                                                    | 3          | Chen et al. (1997)    |
|       | RM304      | 129                                           | 10               | HEX          | 82–198                 | 21                | 0.84 | (GT) <sub>2</sub> (AT) <sub>10</sub> (GT) <sub>33</sub>               | 10         | Temnykh et al. (2000) |

| Panel | SSR Marker | Marker concentration for multiplexed PCR ( nM) | Missing data (%) | Fluorochrome | Allele size range (bp) | Number of alleles | PIC  | Motif                                                                            | Chromosome | References**           |
|-------|------------|------------------------------------------------|------------------|--------------|------------------------|-------------------|------|----------------------------------------------------------------------------------|------------|------------------------|
| 7     | OG17       | 71.67                                          | 2.3              | FAM          | 114-180                | 24                | 0.77 | (CT) <sub>24</sub>                                                               | 2          | Brondani et al. (2001) |
|       | OG44*      | 71.67                                          | 2.8              | HEX          | 152-182                | 15                | 0.80 | (CT) <sub>4</sub> -23bp-(CT) <sub>22</sub> -(GT) <sub>4</sub> -(GC) <sub>6</sub> | 3          | Brondani et al. (2001) |
| 8     | OG106*     | 129                                            | 10               | FAM          | 200-250                | 22                | 0.90 | (CT) <sub>27</sub>                                                               | 9          | Brondani et al. (2001) |
|       | 4879       | 129                                            | 9.5              | HEX          | 108-150                | 10                | 0.80 | (AAT) <sub>8</sub>                                                               | 4          | Rangel (2005)          |
| 9     | 4653*      | 129                                            | 3.9              | FAM          | 80-170                 | 19                | 0.85 | (AAG) <sub>25</sub>                                                              | 12         | Rangel (2005)          |
|       | RM224      | 129                                            | 4.1              | HEX          | 124-158                | 10                | 0.81 | (AAG) <sub>8</sub> -(AG) <sub>13</sub>                                           | 11         | Chen et al. (1997)     |
| 10    | RM223*     | 129                                            | 3.6              | FAM          | 139-163                | 15                | 0.64 | (CT) <sub>25</sub>                                                               | 8          | Chen et al. (1997)     |
|       | RM257      | 71.67                                          | 4.1              | HEX          | 130-192                | 22                | 0.90 | (CT) <sub>24</sub>                                                               | 9          | Chen et al. (1997)     |
| 11    | OG61*      | 129                                            | 2.3              | FAM          | 96-152                 | 28                | 0.88 | (CT) <sub>18</sub>                                                               | 5          | Brondani et al. (2001) |
|       | RM234      | 129                                            | 0.8              | HEX          | 126-156                | 13                | 0.78 | (CT) <sub>25</sub>                                                               | 7          | Chen et al. (1997)     |
| 12    | RM103      | 198                                            | 3.0              | FAM          | 300-350                | 4                 | 0.64 | (GAA) <sub>5</sub>                                                               | 6          | Temnykh et al. (2000)  |
|       | RM334      | 258                                            | 3.3              | FAM          | 120-210                | 14                | 0.86 | (CTT) <sub>20</sub>                                                              | 5          | Temnykh et al. (2000)  |
|       | RM309      | 198                                            | 1.9              | HEX          | 150-180                | 14                | 0.79 | (GT) <sub>13</sub>                                                               | 12         | Temnykh et al. (2000)  |
| 13    | RM286      | 138                                            | 2.1              | FAM          | 80-140                 | 14                | 0.84 | (GA) <sub>16</sub>                                                               | 11         | Temnykh et al. (2000)  |
|       | RM276      | 180                                            | 3.9              | HEX          | 75-160                 | 17                | 0.84 | (AG) <sub>8</sub> -A <sub>3</sub> -(GA) <sub>33</sub>                            | 6          | Temnykh et al. (2000)  |

| Panel | SSR Marker | Marker concentration for multiplexed PCR ( nM) | Missing data (%) | Fluorochrome | Allele size range (bp) | Number of alleles | PIC  | Motif               | Chromosome | References**          |
|-------|------------|------------------------------------------------|------------------|--------------|------------------------|-------------------|------|---------------------|------------|-----------------------|
| 14    | RM125      | 129                                            | 0.3              | FAM          | 100-150                | 13                | 0.58 | (GCT) <sub>8</sub>  | 7          | Temnykh et al. (2000) |
|       | RM171      | 71.67                                          | 7.5              | FAM          | 310-344                | 8                 | 0.59 | (GATG) <sub>5</sub> | 10         | Akagi et al. (1996)   |
|       | RM484      | 71.67                                          | 7.5              | HEX          | 290-300                | 3                 | 0.53 | (AT) <sub>9</sub>   | 10         | Temnykh et al. (2001) |
|       | RM341      | 71.67                                          | 1.0              | HEX          | 110-180                | 19                | 0.76 | (CTT) <sub>20</sub> | 2          | Temnykh et al. (2000) |
| 15    | RM169*     | 258                                            | 0.3              | FAM          | 150-200                | 14                | 0.75 | (GA) <sub>12</sub>  | 5          | Temnykh et al. (2000) |
|       | RM216      | 129                                            | 0.5              | HEX          | 120-155                | 10                | 0.81 | (CT) <sub>18</sub>  | 10         | Chen et al. (1997)    |
| 16    | RM152      | 258                                            | 0.3              | FAM          | 150-180                | 10                | 0.58 | (GGC) <sub>10</sub> | 8          | Akagi et al. (1996)   |
|       | RM267      | 129                                            | 0.3              | HEX          | 125-175                | 11                | 0.49 | (GA) <sub>21</sub>  | 5          | Temnykh et al. (2000) |
| 17    | RM264      | 180                                            | 3.3              | FAM          | 125-195                | 22                | 0.83 | (GA) <sub>27</sub>  | 8          | Temnykh et al. (2000) |
|       | RM263      | 138                                            | 0.8              | HEX          | 164-220                | 13                | 0.80 | (CT) <sub>34</sub>  | 2          | Chen et al. (1997)    |
| 18    | RM335      | 180                                            | 3.3              | FAM          | 100-170                | 26                | 0.90 | (CTT) <sub>25</sub> | 4          | Temnykh et al. (2000) |
|       | RM287      | 138                                            | 8.0              | HEX          | 90-140                 | 12                | 0.75 | (GA) <sub>21</sub>  | 11         | Temnykh et al. (2000) |
| 19    | RM151      | 258                                            | 2.3              | FAM          | 197-220                | 7                 | 0.74 | (TA) <sub>23</sub>  | 1          | Akagi et al. (1996)   |
|       | RM271      | 138                                            | 4.3              | FAM          | 75-125                 | 6                 | 0.80 | (GA) <sub>15</sub>  | 10         | Temnykh et al. (2000) |
|       | RM336*     | 129                                            | 3.3              | HEX          | 100-200                | 6                 | 0.79 | (CTT) <sub>18</sub> | 7          | Temnykh et al. (2000) |

| Panel | SSR Marker | Marker concentration for multiplexed PCR (nM) | Missing Data (%) | Fluorochrome | Allele size range (bp) | Number of alleles | PIC  | Motif                                                                                | Chromosome | References**           |
|-------|------------|-----------------------------------------------|------------------|--------------|------------------------|-------------------|------|--------------------------------------------------------------------------------------|------------|------------------------|
| 20    | RM51       | 270                                           | 14.0             | FAM          | 120-150                | 9                 | 0.77 | (GA) <sub>13</sub>                                                                   | 7          | Chen et al. (1997)     |
|       | RM332      | 129                                           | 12.0             | HEX          | 140-190                | 6                 | 0.62 | (CTT) <sub>5</sub> -(CTT) <sub>14</sub>                                              | 11         | Temnykh et al. (2000)  |
| 21    | RM310      | 116.67                                        | 3.3              | HEX          | 80-130                 | 9                 | 0.84 | (GT) <sub>19</sub>                                                                   | 8          | Temnykh et al. (2000)  |
|       | RM9        | 100                                           | 4.5              | FAM          | 120-200                | 14                | 0.80 | (GA) <sub>15</sub> GT(GA) <sub>2</sub>                                               | 1          | Panaud et al. (1996)   |
|       | RM22*      | 132                                           | 1.3              | HEX          | 150-230                | 7                 | 0.55 | (GA) <sub>22</sub>                                                                   | 3          | Panaud et al. (1996)   |
| 22    | RM55       | 150                                           | 3.2              | HEX          | 200-245                | 18                | 0.89 | (GA) <sub>17</sub>                                                                   | 3          | Chen et al. (1997)     |
|       | RM266      | 210                                           | 8.8              | FAM          | 100-150                | 13                | 0.79 | (GA) <sub>19</sub>                                                                   | 2          | Temnykh et al. (2000)  |
|       | RM278      | 258                                           | 1.3              | HEX          | 120-160                | 17                | 0.89 | (GA) <sub>17</sub>                                                                   | 9          | Temnykh et al. (2000)  |
| 23    | RM85       | 180                                           | 2.3              | FAM          | 80-120                 | 8                 | 0.79 | (TGG) <sub>5</sub> (TCT) <sub>12</sub>                                               | 3          | Temnykh et al. (2000)  |
|       | RM117      | 258                                           | 4.2              | FAM          | 190-220                | 12                | 0.71 | (AG) <sub>7</sub>                                                                    | 12         | Temnykh et al. (2000)  |
|       | RM302      | 180                                           | 1.3              | HEX          | 70-210                 | 8                 | 0.82 | (GT) <sub>30</sub> (AT) <sub>8</sub>                                                 | 1          | Temnykh et al. (2000)  |
| 24    | RM206      | 258                                           | 7.8              | FAM          | 115-210                | 12                | 0.80 | (CT) <sub>21</sub>                                                                   | 11         | Chen et al. (1997)     |
|       | RM159      | 258                                           | 3.1              | HEX          | 220-280                | 9                 | 0.75 | (GA) <sub>19</sub>                                                                   | 5          | Temnykh et al. (2000)  |
| 25    | OG99       | 71.67                                         | 2.3              | FAM          | 110-160                | 7                 | 0.19 | (CT) <sub>4</sub> TT(CT) <sub>4</sub> CC(CT) <sub>3</sub> – 16pb – (CT) <sub>8</sub> | 3          | Brondani et al. (2001) |
|       | OG60       | 71.67                                         | 0.5              | HEX          | 100-160                | 14                | 0.74 | (CT) <sub>21</sub> (TCC) <sub>2</sub>                                                | 4          | Brondani et al. (2001) |

| Panel | SSR Marker | Marker concentration for multiplexed PCR ( nM) | Missing Data (%) | Fluorochrome | Allele size range (bp) | Number of alleles | PIC  | Motif                                  | Chromosome | References**          |
|-------|------------|------------------------------------------------|------------------|--------------|------------------------|-------------------|------|----------------------------------------|------------|-----------------------|
| 26    | RM261      | 138                                            | 4.5              | FAM          | 100-130                | 15                | 0.59 | C <sub>9</sub> (CT) <sub>8</sub>       | 4          | Chen et al. (1997)    |
|       | RM3        | 210                                            | 3.2              | HEX          | 115-160                | 4                 | 0.70 | (GA) <sub>2</sub> GG(GA) <sub>25</sub> | 6          | Panaud et al. (1996)  |
| 27    | RM220      | 150                                            | 2.4              | FAM          | 90-135                 | 9                 | 0.69 | (CT) <sub>17</sub>                     | 1          | Chen et al. (1997)    |
|       | RM280      | 258                                            | 4.1              | HEX          | 140-190                | 6                 | 0.88 | (GA) <sub>16</sub>                     | 4          | Temnykh et al. (2000) |
|       | RM7        | 210                                            | 3.0              | FAM          | 160-195                | 15                | 0.85 | (GA) <sub>19</sub>                     | 3          | Panaud et al. (1996)  |
| 28    | RM144*     | 258                                            | 9.5              | FAM          | 200-250                | 15                | 0.75 | (ATT) <sub>11</sub>                    | 11         | Temnykh et al. (2000) |
|       | RM243      | 129                                            | 4.2              | FAM          | 85-130                 | 10                | 0.75 | (CT) <sub>18</sub>                     | 1          | Chen et al. (1997)    |
|       | RM317      | 258                                            | 5.0              | HEX          | 120-180                | 9                 | 0.76 | (GC) <sub>4</sub> (GT) <sub>18</sub>   | 4          | Temnykh et al. (2000) |
| 29    | RM190*     | 150                                            | 0.5              | FAM          | 100-130                | 11                | 0.75 | (CT) <sub>11</sub>                     | 6          | Akagi et al. (1996)   |
|       | RM205      | 210                                            | 0.5              | HEX          | 115-170                | 14                | 0.78 | (CT) <sub>25</sub>                     | 9          | Chen et al. (1997)    |
|       | RM70       | 258                                            | 11.5             | FAM          | 150-215                | 11                | 0.80 | (ATT) <sub>33</sub>                    | 7          | Chen et al. (1997)    |
| 30    | RM14       | 270                                            | 10.0             | HEX          | 160-120                | 9                 | 0.81 | (GA) <sub>18</sub>                     | 1          | Panaud et al. (1996)  |
|       | 5371*      | 258                                            | 8.4              | FAM          | 150-210                | 5                 | 0.83 | (GAA) <sub>14</sub>                    | 12         | Rangel (2005)         |
|       | RM178      | 258                                            | 4.3              | HEX          | 110-140                | 8                 | 0.69 | (GA) <sub>5</sub> (AG) <sub>8</sub>    | 5          | Temnykh et al. (2000) |
| 31    | RM210      | 129                                            | 1.3              | FAM          | 115-175                | 15                | 0.87 | (CT) <sub>23</sub>                     | 8          | Chen et al. (1997)    |
|       | RM240      | 129                                            | 0.3              | HEX          | 120-160                | 5                 | 0.47 | (CT) <sub>21</sub>                     | 2          | Chen et al. (1997)    |

| Panel          | SSR Marker | Marker concentration for multiplexed PCR ( nM) | Missing Data (%) | Fluorochrome | Allele size range (bp) | Number of alleles | PIC  | Motif                                                   | Chromosome | References**           |
|----------------|------------|------------------------------------------------|------------------|--------------|------------------------|-------------------|------|---------------------------------------------------------|------------|------------------------|
| 32             | RM161      | 198                                            | 4.4              | HEX          | 150-200                | 8                 | 0.59 | (AG) <sub>20</sub>                                      | 5          | Temnykh et al. (2000)  |
|                | RM135      | 198                                            | 1.3              | FAM          | 100-140                | 5                 | 0.55 | (CGG) <sub>10</sub>                                     | 3          | Akagi et al. (1996)    |
|                | OG10*      | 258                                            | 0.0              | HEX          | 40-130                 | 21                | 0.81 | (CT) <sub>29</sub>                                      | 9          | Brondani et al. (2001) |
| 33             | RM30       | 270                                            | 4.9              | HEX          | 70-120                 | 15                | 0.64 | (AG) <sub>9</sub> A(GA) <sub>12</sub>                   | 6          | Panaud et al. (1996)   |
|                | RM154      | 258                                            | 5.3              | HEX          | 140-210                | 14                | 0.91 | (GA) <sub>21</sub>                                      | 2          | Akagi et al. (1996)    |
|                | RM119      | 258                                            | 7.0              | FAM          | 150-185                | 6                 | 0.75 | (GTC) <sub>6</sub>                                      | 4          | Temnykh et al. (2000)  |
| 34             | RM311      | 270                                            | 5.0              | HEX          | 160-200                | 8                 | 0.74 | (GT) <sub>3</sub> (GTAT) <sub>8</sub> (GT) <sub>5</sub> | 10         | Temnykh et al. (2000)  |
|                | RM53*      | 258                                            | 10.0             | FAM          | 168-208                | 7                 | 0.76 | (GA) <sub>14</sub>                                      | 2          | Chen et al. (1997)     |
| 35             | RM12       | 129                                            | 2.1              | FAM          | 150-190                | 7                 | 0.41 | (GA) <sub>21</sub>                                      | 12         | Panaud et al. (1996)   |
|                | RM19       | 258                                            | 11.0             | HEX          | 200-270                | 11                | 0.72 | (ATC) <sub>10</sub>                                     | 12         | Panaud et al. (1996)   |
| <b>Average</b> | -          | -                                              | -                | -            | -                      | 12.4              | 0.75 | -                                                       | -          | -                      |

\* Markers with presence of PCR artifacts (especially stutters)

\*\*References

- Akagi H, Yokozeki Y, Inagaki A, Fujimura T (1996) Microsatellite DNA markers for rice chromosomes. *Theor Appl Genet* 93: 1071-1077.
- Brondani C, Brondani RPV, Rangel PHN, Ferreira ME (2001) Development and mapping of *Oryza glumaepatula* derived microsatellite markers in the interspecific cross *O. glumaepatula* x *O. sativa*. *Hereditas* 134: 59-71.
- Chen X, Temnykh S, Xu Y, Cho YG, McCouch SR (1997) Development of a microsatellite framework map providing genome-wide coverage in rice (*Oryza sativa* L.). *Theor Appl Genet* 95: 553-567
- Panaud O, Chen X, McCouch SR (1996) Development of microsatellite markers and characterization of simple sequence length polymorphism (SSLP) in rice (*Oryza sativa* L.). *Mol Gen Genet* 252: 597-607
- Rangel, PN. Construção de mapa de ligação e mapeamento de QTLs utilizando marcadores SSRs, ESTs e SNPs em cruzamento interespecífico *Oryza glumaepatula* X *Oryza sativa*. Thesis, Universidade Federal de Goiás, 111 pp.
- Temnykh S, Park WD, Ayres NM, Cartinhour S, Hauck N, Lipovich L, Cho YG, Ishii T, McCouch SR (2000) Mapping and genome organization of microsatellite sequences in rice (*Oryza sativa* L.). *Theor Appl Genet* 100: 697-712
